# Supplementary material
Source: Springer Nature journal article supplement (https://www.springermedizin.de/resource/supplementary/12883_2011_578_MOESM2_ESM.pdf/9455748)

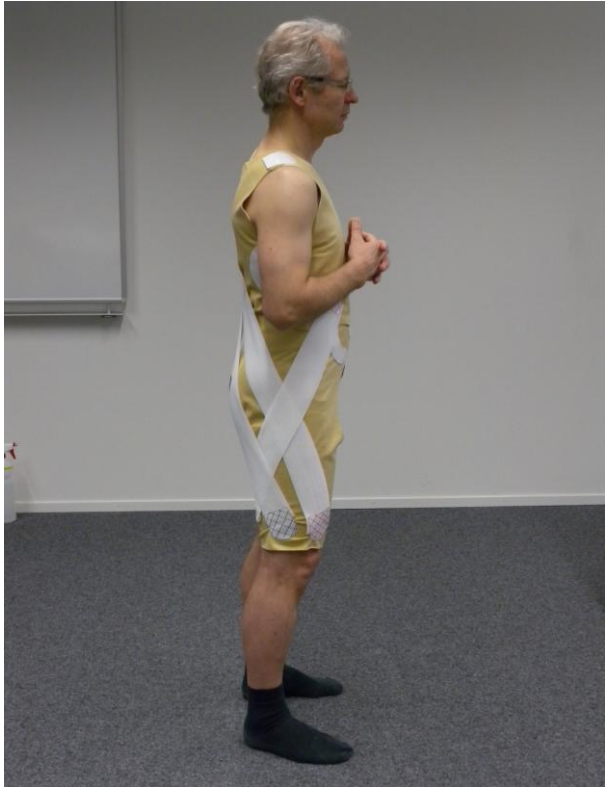

Supplement: MOESM2 [file 9455748]
